# Supplementary material for: Mn4+ non-equivalent doped fluoride phosphors with a short fluorescence decay time for backlighting
Source: Royal Society of Chemistry journal article supplement (doi:10.1039/d1dt04191f), 2022-01-01
Supplement: d1dt04191f1.pdf [file d1dt04191f1.pdf]

## Electronic Supplementary Information

### **Mn<sup>4+</sup> non-equivalent doped fluoride phosphor towards a short fluorescence decay time for backlighting**

Jie Li,<sup>a</sup> Xinyi Yang,<sup>b</sup> Tong Li,<sup>a</sup> Yanqing Ye,<sup>a</sup> Yayun Zhou,<sup>\*\*c</sup> Qin Wang,<sup>b</sup> Qiang

Zhou<sup>a</sup> and Zhengliang Wang<sup>\*,a</sup>

<sup>a</sup> Key Laboratory of Green-chemistry Materials in University of Yunnan Province,  
Key Laboratory of Advanced Synthetic Chemistry (Yunnan Minzu University) of  
State Ethnic Affairs Commission, School of Chemistry & Environment, Yunnan  
Minzu University, Kunming, 650500, P. R. China.

<sup>b</sup> College of Chemistry and Chemical Engineering, Yunnan Normal University,  
Kunming, Yunnan 650500, P. R. China.

<sup>c</sup> State Key Laboratory of Luminescent Materials and Devices, and Guangdong  
Provincial Key Laboratory of Fiber Laser Materials and Applied Techniques, South  
China University of Technology, Guangzhou 510641, P. R. China.

Email: \*wangzhengliang@foxmail.com, \*\*zhouyayun@scut.edu.cn.

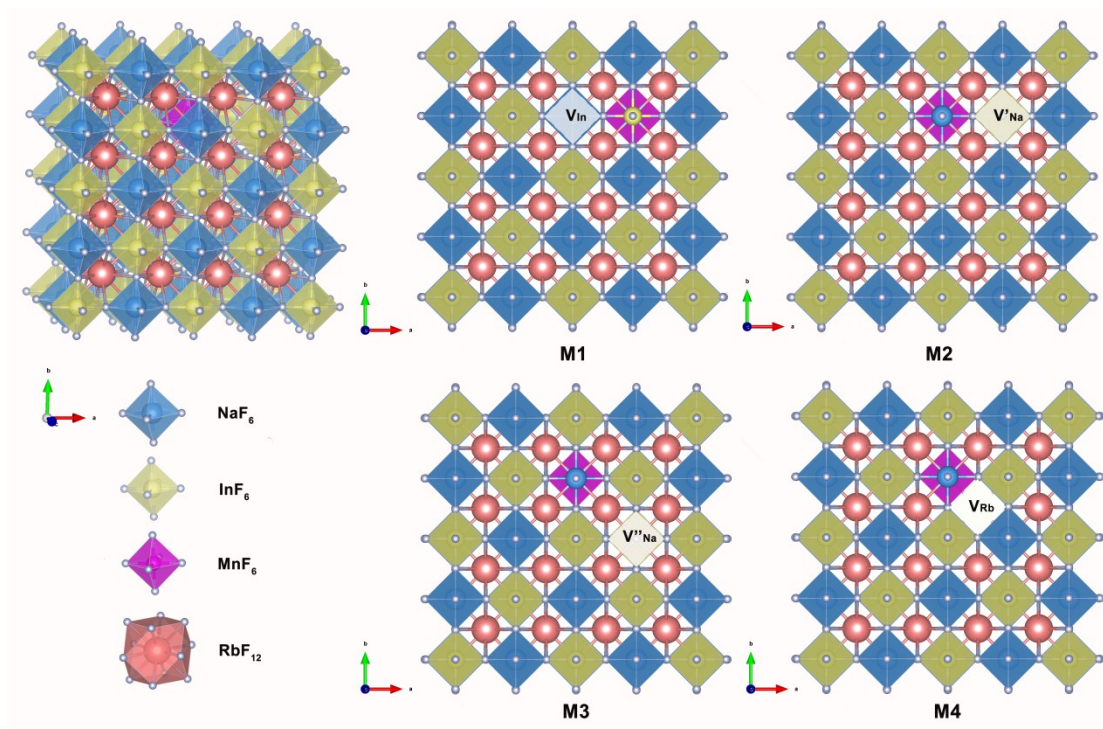

**Fig. S1** The simulation structure diagram for four possible Mn<sup>4+</sup> substitution models

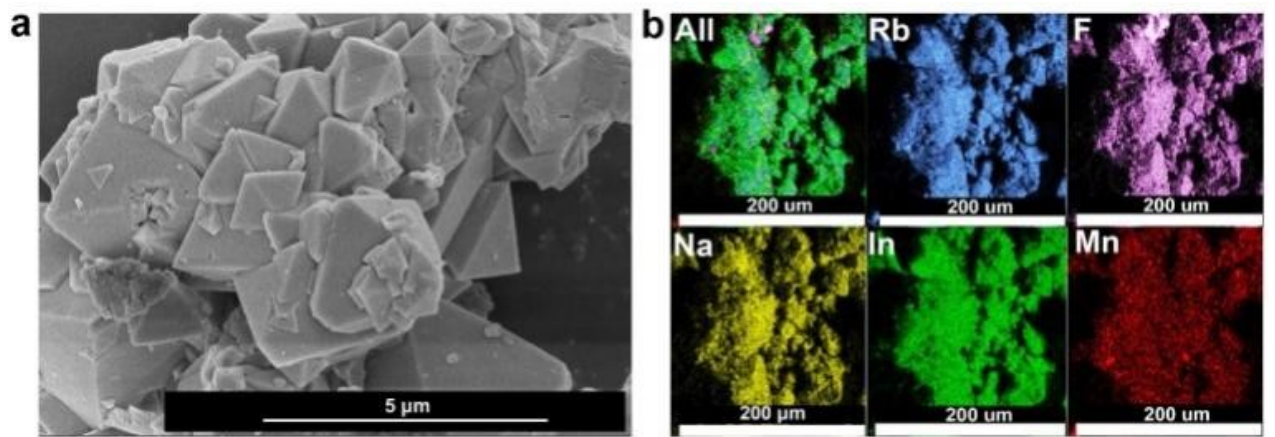

**Fig. S2** (a) SEM morphology and (b) element mapping of  $\text{Rb}_2\text{NaInF}_6:\text{Mn}^{4+}$  (5.59 mol%).

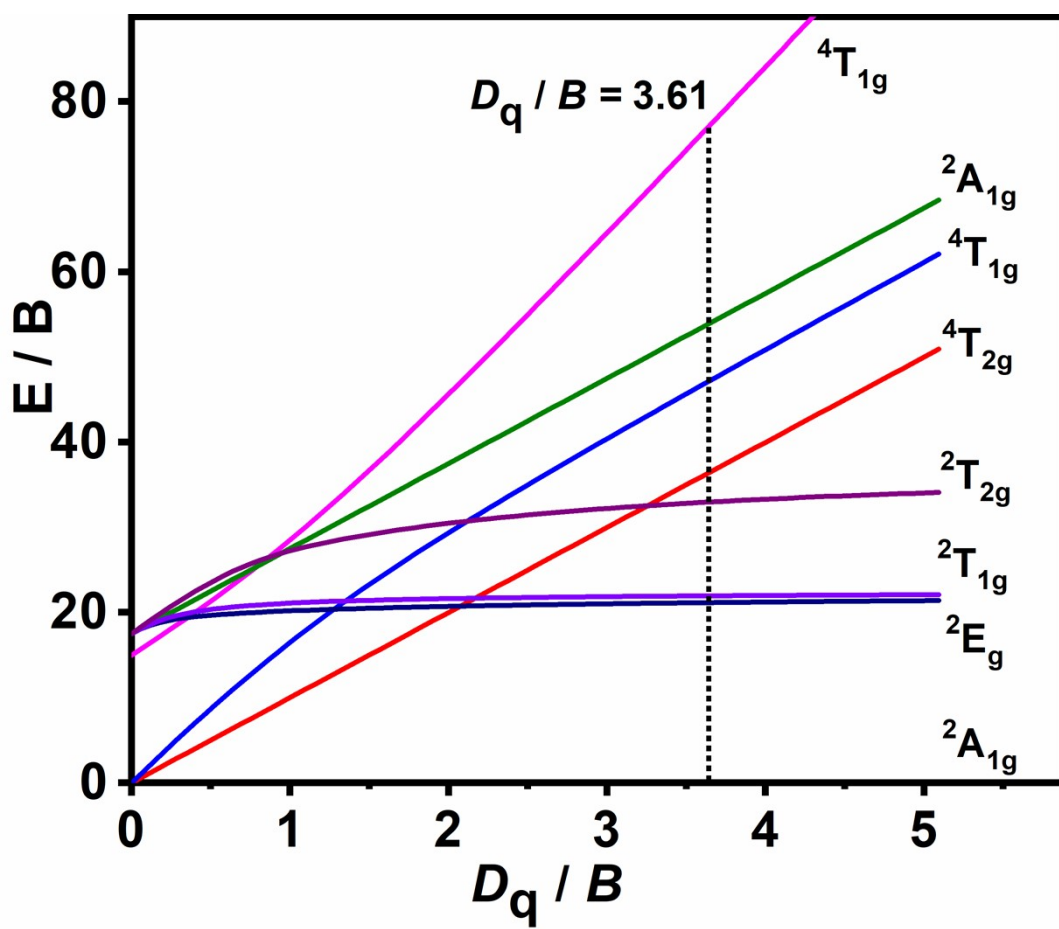

Fig. S3 Tanabe Sugano energy level diagram of  $Mn^{4+}$  in this case.

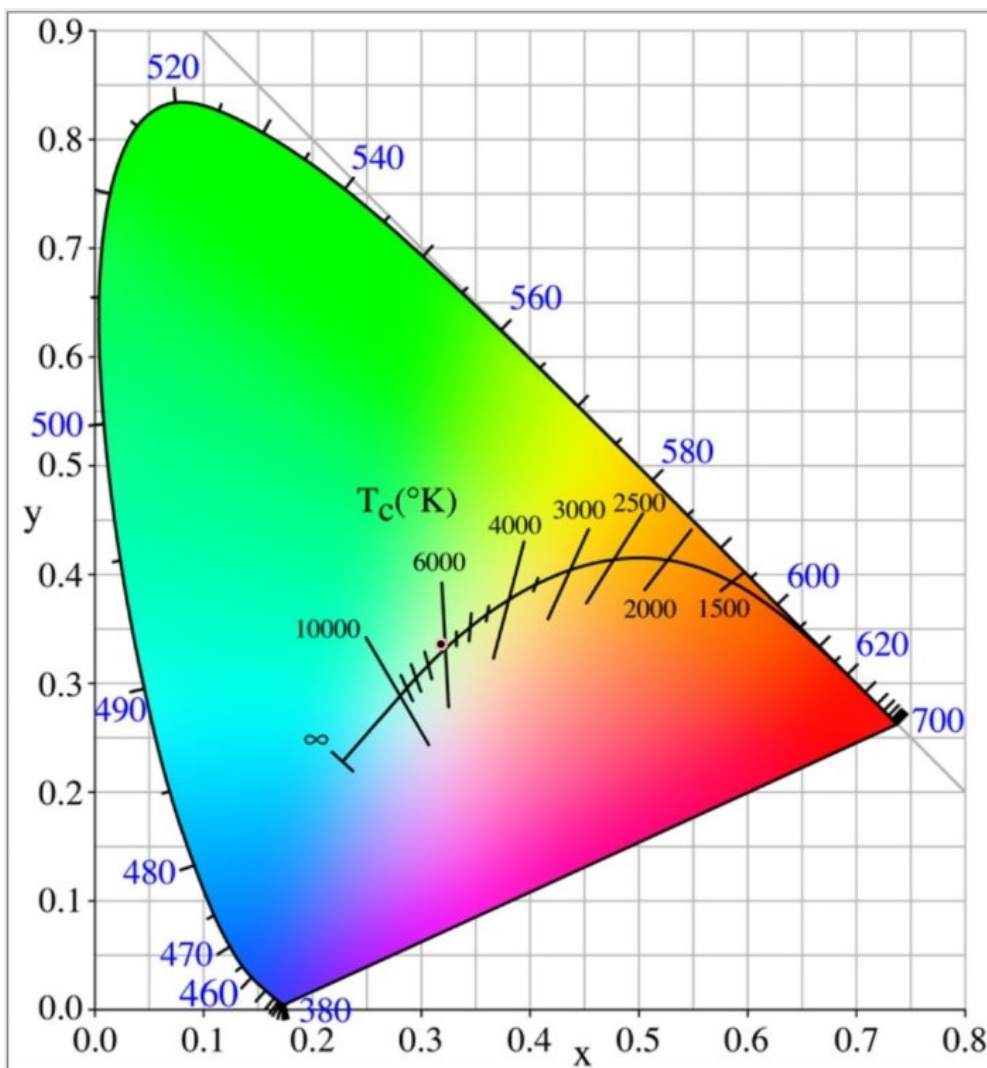

**Fig. S4** CIE coordinates of white LEDs combined with  $\text{Rb}_2\text{NaInF}_6:\text{Mn}^{4+}$ ,  $\beta\text{-SiAlON}:\text{Eu}^{2+}$ , and a blue GaN chip.

**Tab. S1** XRF results of  $\text{Rb}_2\text{NaInF}_6:\text{Mn}^{4+}$ .

| No. | Amount of $\text{K}_2\text{MnF}_6$ (mmol) | Doping amount of $\text{Mn}^{4+}$ (mol%) |
|-----|-------------------------------------------|------------------------------------------|
| 1   | 0.05                                      | 1.89%                                    |
| 2   | 0.10                                      | 3.62%                                    |
| 3   | 0.15                                      | 5.59%                                    |
| 4   | 0.20                                      | 7.70%                                    |
| 5   | 0.25                                      | 8.99%                                    |

**Tab. S2** The unit cell parameters of  $\text{Rb}_2\text{NaInF}_6:\text{Mn}^{4+}$  phosphor samples after refining in comparison with those of  $\text{Rb}_2\text{NaInF}_6$ .

| Formula           | $\text{Rb}_2\text{NaInF}_6$ | $\text{Rb}_2\text{NaInF}_6:\text{Mn}^{4+}$ |
|-------------------|-----------------------------|--------------------------------------------|
| Crystal           | Cubic                       | Cubic                                      |
| Space group       | Fm-3m                       | Fm-3m                                      |
| $a/\text{\AA}$    | 8.86060                     | 8.6756(2)                                  |
| $b/\text{\AA}$    | 8.86060                     | 8.6756(2)                                  |
| $c/\text{\AA}$    | 8.86060                     | 8.6756(2)                                  |
| $\alpha$          | 90                          | 90                                         |
| $\beta$           | 90                          | 90                                         |
| $\gamma$          | 90                          | 90                                         |
| $V(\text{\AA}^3)$ | 695.65                      | 652.98(2)                                  |
| $Z$               | 4                           | 4                                          |
| $R_{\text{wp}}$   | /                           | 9.62%                                      |
| $R_{\text{p}}$    | /                           | 7.18%                                      |
| $R_{\text{exp}}$  | /                           | 5.37%                                      |
| $\chi^2$          | /                           | 3.21                                       |

**Tab. S3** The possible Substitution models for  $\text{Rb}_2\text{NaInF}_6:\text{Mn}^{4+}$  and the corresponding calculated formation energy.

| Model | Host lattice                | Substitution forms              | Vacancy                  | Formation energy (eV) |
|-------|-----------------------------|---------------------------------|--------------------------|-----------------------|
| M1    | $\text{Rb}_2\text{NaInF}_6$ | $\text{Mn}_{\text{Na}}^{\dots}$ | $V_{\text{In}}^{\dots}$  | 14.81                 |
| M2    | $\text{Rb}_2\text{NaInF}_6$ | $\text{Mn}_{\text{In}}^{\cdot}$ | $V_{\text{Na}1}^{\cdot}$ | 9.78                  |
| M3    | $\text{Rb}_2\text{NaInF}_6$ | $\text{Mn}_{\text{In}}^{\cdot}$ | $V_{\text{Na}2}^{\cdot}$ | 10.15                 |
| M4    | $\text{Rb}_2\text{NaInF}_6$ | $\text{Mn}_{\text{In}}^{\cdot}$ | $V_{\text{Rb}}^{\cdot}$  | 10.47                 |



**Tab. S4** Color coordinate offset for  $\text{Rb}_2\text{NaInF}_6:\text{Mn}^{4+}$  (5.59 mol%) under different temperatures.

| Temperature ( $^{\circ}\text{C}$ ) | CIE coordinates (x, y) | $\Delta E$ |
|------------------------------------|------------------------|------------|
| 20                                 | 0.692, 0.307           | /          |
| 40                                 | 0.691, 0.309           | 0.0042     |
| 60                                 | 0.689, 0.310           | 0.0084     |
| 80                                 | 0.688, 0.312           | 0.0125     |
| 100                                | 0.686, 0.313           | 0.0166     |
| 120                                | 0.684, 0.316           | 0.0234     |
| 140                                | 0.682, 0.318           | 0.0287     |
| 160                                | 0.678, 0.321           | 0.0381     |
| 180                                | 0.675, 0.325           | 0.0471     |
| 200                                | 0.672, 0.328           | 0.0547     |

**Tab. S5** EQE, IQE values of  $\text{Rb}_2\text{NaInF}_6:\text{Mn}^{4+}$  with different contents of  $\text{Mn}^{4+}$ .

| Content of $\text{Mn}^{4+}$ (mol%) | EQE (%) | IQE (%) |
|------------------------------------|---------|---------|
| 1.89                               | 19.4    | 79.9    |
| 3.62                               | 28.8    | 70.4    |
| 5.59                               | 37.5    | 68.8    |
| 7.70                               | 30.4    | 66.4    |
| 8.99                               | 26.2    | 51.3    |

**Tab. S6** Photoelectric parameters of the as-fabricated w-LED under different currents.

| Phosphor                                                                      | Current | LE     | CIE    |        | Tc   | NTSC |
|-------------------------------------------------------------------------------|---------|--------|--------|--------|------|------|
|                                                                               |         | lm/W   | x      | y      | (K)  | (%)  |
| $\beta$ -SiALON<br>+<br>$\text{Rb}_2\text{NaInF}_6:\text{Mn}^{4+}$<br>(5.59%) | 20      | 30.5   | 0.3137 | 0.3341 | 6418 | 93.5 |
|                                                                               | 40      | 27.6   | 0.3096 | 0.3332 | 6641 | 93.3 |
|                                                                               | 60      | 24.2   | 0.3055 | 0.3310 | 6886 | 93.1 |
|                                                                               | 80      | 23.9   | 0.3019 | 0.3290 | 7110 | 93.1 |
|                                                                               | 100     | 23.0   | 0.2989 | 0.3268 | 7321 | 92.8 |
|                                                                               | 120     | 21.5   | 0.2960 | 0.3246 | 7536 | 92.5 |
|                                                                               | 140     | 20.9   | 0.2940 | 0.3237 | 7678 | 92.5 |
|                                                                               | 160     | 19.8   | 0.2903 | 0.3169 | 8019 | 91.8 |
|                                                                               | 180     | 18.0   | 0.2887 | 0.3236 | 8034 | 92.7 |
|                                                                               | 200     | 19.0   | 0.2891 | 0.3224 | 8036 | 92.1 |
|                                                                               | 220     | 17.9   | 0.2847 | 0.3199 | 8414 | 91.7 |
|                                                                               | 240     | 16.5   | 0.2834 | 0.3133 | 8689 | 90.8 |
|                                                                               | 260     | 16.0   | 0.2824 | 0.3142 | 8738 | 90.7 |
|                                                                               | 280     | 15.5   | 0.2821 | 0.3157 | 8710 | 90.6 |
| 300                                                                           | 15.2    | 0.2816 | 0.3184 | 8670   | 91.1 |      |
